# Supplementary material for: Analysis of MicroRNA Expression Profiles in Weaned Pig Skeletal Muscle after Lipopolysaccharide Challenge
Source: MDPI journal article supplement (doi:10.3390/ijms160922438), 2015-09-16
Supplement: s1 [file s1]

## Supplementary Information

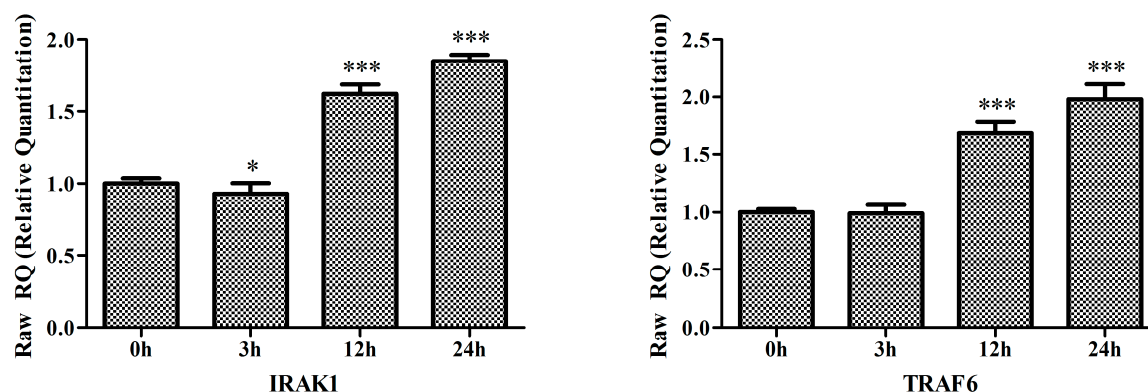

**Figure S1.** LPS upregulates the expression of IRAK1 and TRAF6 in C2C12 myotubes. C2C12 myotubes were treated with 1000 ng/mL LPS for the indicated periods. Triplicate samples of cells were collected at each time point. RT-qPCR was performed to determine the time-dependent effects of LPS on the expression of IRAK1 and TRAF6. \*  $p < 0.05$ , \*\*\*  $p < 0.001$  vs. 0 h.

**Table S4.** Specific primers sequences for pigs used for qPCR.

| Gene                           | Forward (5'–3')        | Reverse (5'–3')         |
|--------------------------------|------------------------|-------------------------|
| <i>TNF-<math>\alpha</math></i> | TCCAATGGCAGAGTGGGTATG  | AGCTGGTTGTCTTTCAGCTTCAC |
| <i>TLR4</i>                    | TCAGTTCTCACCTTCCTCCTG  | GTTTCATTCTCACCCAGTCTTC  |
| <i>MyD88</i>                   | GATGGTAGCGGTTGTCTCTGAT | GTTTCATTCTCACCCAGTCTTC  |
| <i>MAFbx</i>                   | TCACAGCTCACATCCCTGAG   | GACTTGCCGACTCTCTGGAC    |
| <i>MuRF1</i>                   | ATGGAGAACCTGGAGAAGCA   | ACGGTCCATGATCACCTCAT    |
| <i>GAPDH</i>                   | CGTCCCTGAGACACGATGGT   | GCCTTGACTGTGCCGTGGAAT   |
